# Supplementary material for: Redox- and metal-directed structural diversification in designed metalloprotein assemblies
Source: Royal Society of Chemistry journal article supplement (doi:10.1039/d2cc02440c), 2022-01-01
Supplement: d2cc02440c1.pdf [file d2cc02440c1.pdf]

## Redox- and metal-directed structural diversification in designed metalloprotein assemblies

Albert Kakkis<sup>a</sup>, Eyal Golub<sup>a</sup>, Tae Su Choi<sup>a</sup>, and F. Akif Tezcan<sup>a</sup>

<sup>a</sup>Department of Chemistry and Biochemistry, University of California, San Diego, La Jolla, California, 92093

### Supporting Materials, Tables, and Figures

|                                                                                                                                                                                                           |     |
|-----------------------------------------------------------------------------------------------------------------------------------------------------------------------------------------------------------|-----|
| <b>Materials and Methods</b> .....                                                                                                                                                                        | S2  |
| <b>Supplementary Discussion</b> .....                                                                                                                                                                     | S4  |
| Figure S1: Crystal structures of Zn-bound RIDC1 variants.....                                                                                                                                             | S5  |
| Figure S2: SV-AUC distributions of metal-bound <sup>A74/C96</sup> RIDC1 <sup>ox</sup> <sub>4</sub> .....                                                                                                  | S6  |
| Figure S3: Overlays of apo and metal-bound <sup>A74/C96</sup> RIDC1 <sup>ox</sup> crystal structures.....                                                                                                 | S7  |
| Figure S4: Crystal structures of Co-bound [ <sup>A74/C96</sup> RIDC1 <sup>ox</sup> ] <sub>4</sub> .....                                                                                                   | S8  |
| Figure S5: Crystal structures of Zn-bound [ <sup>A74/C96</sup> RIDC1 <sup>ox</sup> ] <sub>4</sub> and Zn <sub>4</sub> :[ <sup>A74/C96</sup> RIDC1 <sup>red</sup> ] <sub>4</sub> .....                     | S9  |
| Figure S6: Geometries of Fe, Co, and Ni coordination sites .....                                                                                                                                          | S10 |
| Figure S7: Geometries of Cu and Zn coordination sites.....                                                                                                                                                | S11 |
| Figure S8: SV-AUC distributions of <sup>A74/C96</sup> RIDC1 <sup>red</sup> in the presence of different metal ions.....                                                                                   | S12 |
| Figure S9: Crystal structure of Fe <sub>2</sub> :[ <sup>A74/C96</sup> RIDC1 <sup>red</sup> ] <sub>3</sub> .....                                                                                           | S13 |
| Figure S10: Crystal structure of Ni <sub>2</sub> :[ <sup>A74/C96</sup> RIDC1 <sup>red</sup> ] <sub>3</sub> .....                                                                                          | S14 |
| Figure S11: Crystal structures of Cu <sub>4</sub> :[ <sup>A74/C96</sup> RIDC1 <sup>red</sup> ] <sub>4</sub> .....                                                                                         | S15 |
| Figure S12: Structural comparisons of M:[ <sup>A74/C96</sup> RIDC1] with other cytochrome <i>cb</i> <sub>562</sub> variants.....                                                                          | S16 |
| Figure S13: DFT calculations of Ni <sup>II</sup> - and Fe <sup>II</sup> -bound His <sub>3</sub> , His <sub>5</sub> , and His <sub>6</sub> coordination sites...S17                                        |     |
| Figure S14: DFT calculations of hypothetical Ni <sup>II</sup> :His <sub>6</sub> site based on Fe <sub>2</sub> :[ <sup>A74/C96</sup> RIDC1 <sup>red</sup> ] <sub>3</sub> .....                             | S18 |
| Figure S15: ESI-MS of <sup>A74/C96</sup> RIDC1 <sup>ox</sup> .....                                                                                                                                        | S19 |
| Figure S16: Denaturing SDS-PAGE gel of <sup>A74/C96</sup> RIDC1 under reducing conditions.....                                                                                                            | S20 |
| Table S1: BSA calculations of RIDC1-based assemblies .....                                                                                                                                                | S21 |
| Table S2: SV-AUC parameters of apo, metal-loaded <sup>A74/C96</sup> RIDC1.....                                                                                                                            | S22 |
| Table S3: X-ray refinement statistics of apo, metal-bound <sup>A74/C96</sup> RIDC1 structures.....                                                                                                        | S23 |
| Table S4: Crystallization conditions for apo, metal-supplemented <sup>A74/C96</sup> RIDC1.....                                                                                                            | S25 |
| Table S5: Rosetta interface calculations of Ni <sub>2</sub> :[ <sup>A74/C96</sup> RIDC1 <sup>red</sup> ] <sub>3</sub> and Fe <sub>2</sub> :[ <sup>A74/C96</sup> RIDC1 <sup>red</sup> ] <sub>3</sub> ..... | S26 |
| Table S6: DFT-computed energies of metal coordination sites of RIDC1-based variants.....                                                                                                                  | S26 |
| <b>References</b> .....                                                                                                                                                                                   | S27 |

## Materials and Methods

**Mutagenesis, Expression, and Purification.** <sup>A74/C96</sup>RIDC1 is a variant of Rosetta interface design cytochrome-1 (RIDC1), which is itself a variant of cytochrome cb<sub>562</sub>.<sup>1</sup> PCR-based site-directed mutagenesis of plasmids encoding RIDC1 (pET20b-[RIDC1]) was performed as previously described.<sup>2</sup> Purified plasmids were transformed into competent BL21 (DE3) *E. coli* cells containing the *ccm* (cytochrome c maturation) cassette plasmid, pEC86.<sup>3</sup> Colonies were allowed to grow for 20 hours on LB/agar plates containing ampicillin (100 µg/mL) and chloramphenicol (34 µg/mL). Starter cultures were grown overnight for 16 hours at 37°C in LB media supplemented with the same antibiotic concentrations, diluted 100-fold into fresh, antibiotic supplemented LB media, and then grown at 37°C until the OD<sub>600</sub> reached 0.6-1. Cultures were inoculated into 2.8 L glass flasks containing 1 L of LB media supplemented with antibiotics and shaken at 100 RPM for 20-24 hours at 37°C. Cells were pelleted via centrifugation (5,000 x g, 4°C, 5 min) and the media discarded. The red cell pellets were resuspended in a 10 mM sodium acetate buffer solution (pH 5.0) and vigorously stirred until all pellets were resuspended. The resulting mixture was sonicated for 15 min in pulses of 30 s on and 60 s off (Qsonica). The lysate was titrated with sodium hydroxide to a pH of 10, and then acetic acid to a pH of 5.0, and then clarified by centrifugation (10,000 x g, 4°C, 20 min). The cleared lysate was applied to a CM Sepharose Fast Flow (Biorad) resin preequilibrated with a 10 mM sodium acetate buffer solution (pH 5.0) and eluted using a step-gradient of 0-500 mM NaCl. The visibly red eluate was pooled, concentrated, and exchanged into 10 mM NaP<sub>i</sub> buffer solution (pH 8.0). The protein was then loaded onto a 5 mL High-Q cartridge column preequilibrated with the same buffer solution and eluted using a step-gradient of 0-1 M NaCl. Fractions with Reinheitszahl ratios ( $A_{415}/A_{280}$ ) above 3 were pooled, concentrated, exchanged into a 20 mM MOPS buffer solution supplemented with 150 mM NaCl, and loaded onto a Superdex S75 size column. Fractions with Reinheitszahl ratios ( $A_{415}/A_{280}$ ) above 5.5 were pooled, concentrated, and treated with 5 mM EDTA/DPA.

**Sedimentation velocity analytical ultracentrifugation (SV-AUC).** Oxidized protein samples (200 µM monomer) were mixed directly with metal salts. To obtain reduced protein samples (200 µM monomer), the samples were incubated with 5 equivalents Tris(3-hydroxypropyl) phosphine (THPP) for 15 minutes prior to metal addition. Co<sup>II</sup>, Ni<sup>II</sup>, Cu<sup>II</sup>, and Zn<sup>II</sup> additions were made at 1 equivalent metal/monomer under aerobic conditions, while Fe<sup>II</sup> additions were made at 1 or 5 equivalents/monomer in an anaerobic chamber. Due to the possibility of irreversible electron transfer from non-heme Fe<sup>II</sup> to the ferric-heme cofactors of <sup>A74/C96</sup>RIDC1 under oxidized conditions, SV measurements of <sup>A74/C96</sup>RIDC1<sup>ox</sup> mixed with Fe<sup>II</sup> are not reported. Sedimentation velocity (SV) measurements were made in a solution of 20 mM TRIS (pH 7.5) at 25°C on a Beckman XL-A instrument equipped with a AN-60 Ti rotor and at 41,000 RPM. Samples were monitored at 570 nm (corresponding to a Q band of cytochrome) up to 12 h. Scans were processed and molecular weight distributions calculated using SEDFIT software.<sup>4</sup> Fitting parameters such as the buffer density (0.9988 g/mL), buffer viscosity (0.01007 poise), and partial specific volume (0.7313 mL/g) were calculated by SEDNTERP. SV profiles are shown at a confidence level of 95%.<sup>4, 5</sup> Oligomerization yields were estimated based on Riemann integrations of the peaks of the SV profiles, where the bounds of each discrete peak were defined by the full width at half maximum (FWHM).

**X-ray Structure Determination.** Crystals of <sup>A74/C96</sup>RIDC1 variants were obtained by sitting-drop vapor diffusion at 25°C. To obtain crystals of oxidized samples, 2-2.5 mM protein monomer was mixed with 1-5 equivalents of metal salts for at least one hour at 25°C. To obtain crystals of reduced samples, 2-2.5 mM protein monomer was mixed with 5-10 equivalents of either THPP or tris(2-carboxyethyl)phosphine (TCEP) prior to metal addition in an anaerobic chamber. Metal-loaded samples were mixed at a ratio of 1 µL: 1 µL or 2 µL: 1 µL with mother liquor. All crystals

were transferred into perfluoro polyether (Hampton) for cryoprotection prior to freezing. Diffraction data were collected at 80-100 K on ALS Beamline 5.0.1 (Apo [<sup>A74/C96</sup>RIDC1<sup>ox</sup>]<sub>4</sub>), SSRL Beamline 9-2 (Co<sub>2</sub>: [<sup>A74/C96</sup>RIDC1<sup>ox</sup>]<sub>4</sub>, Zn<sub>2</sub>: [<sup>A74/C96</sup>RIDC1<sup>ox</sup>]<sub>4</sub>, Fe<sub>2</sub>: [<sup>A74/C96</sup>RIDC1<sup>red</sup>]<sub>3</sub>, Ni<sub>2</sub>: [<sup>A74/C96</sup>RIDC1<sup>red</sup>]<sub>3</sub>, Zn<sub>4</sub>: [<sup>A74/C96</sup>RIDC1<sup>red</sup>]<sub>4</sub>), and ALS Beamline 8.3.1 (Cu<sub>4</sub>: [<sup>A74/C96</sup>RIDC1<sup>red</sup>]<sub>4</sub>). Diffraction data were processed using either iMOSFLM or XDS and scaled using SCALA.<sup>6</sup> Molecular replacement was carried out using Phaser with monomeric cytochrome cb<sub>562</sub> (PDB: 2BC5) as the search model.<sup>7</sup> Refinement was performed using phenix.refine while model building and placement of metal ions/water was performed using COOT.<sup>8</sup> Electron density maps were generated using Phenix and then converted into CCP4 map files using a Fast Fourier Transform algorithm (FFT, CCP4i).<sup>6</sup> All final models and CCP4 electron density maps were rendered in PYMOL ([www.pymol.org](http://www.pymol.org)). Surface calculations were performed using PISA.<sup>9</sup>

**Rosetta Interface Energy Calculations:** To estimate the stability of Fe<sub>2</sub>: [<sup>A74/C96</sup>RIDC1<sup>red</sup>]<sub>3</sub> and Ni<sub>2</sub>: [<sup>A74/C96</sup>RIDC1<sup>red</sup>]<sub>3</sub> based on non-covalent interactions while excluding the contribution of metal-ligand interactions, Rosetta score calculations were performed on Fe<sub>2</sub>: [<sup>A74/C96</sup>RIDC1<sup>red</sup>]<sub>3</sub> and Ni<sub>2</sub>: [<sup>A74/C96</sup>RIDC1<sup>red</sup>]<sub>3</sub> crystal structures. In each case, the heme cofactors and all metal ions and water molecules were removed prior to loading the trimeric complex into Rosetta. After evaluating the Rosetta score of the trimer, the chains were moved 100 Å apart and the Rosetta score of the system was re-evaluated. Following these calculations, the sum of REU values for metal-binding histidine residues (H59, H63, H73, H77) was subtracted from each Rosetta score. Finally, the adjusted Rosetta score of the trimer was subtracted from that of the separated chains to obtain a ΔREU value that serves as a proxy for the ΔΔG of trimerization.<sup>10</sup>

**DFT calculations:** All metal complexes were extracted from crystal structures of RIDC1 variants. Input files were prepared using Avogadro software.<sup>11</sup> Single point calculations were performed at the level of B3LYP theory using the 6-31G basis set.<sup>12</sup> Calculations were performed without an initial geometry optimization step to avoid introducing model bias. To generate the hypothetical Ni<sup>II</sup>:His<sub>6</sub> coordination site in Fe<sub>2</sub>: [<sup>A74/C96</sup>RIDC1<sup>red</sup>]<sub>3</sub>, the position of the His77 residue of the Fe<sup>II</sup>:His<sub>5</sub> site was modified to be within coordinating distance of the metal center. This new rotamer was predicted by the Dunbrack rotamer library to be the most stable metal-binding rotamer accessible.<sup>13</sup>

## Supplementary Discussion

**Oligomerization of metal-directed <sup>A74/C96</sup>RIDC1<sup>red</sup> assemblies.** As described in the main text, the addition of Fe<sup>II</sup> or Ni<sup>II</sup> to <sup>A74/C96</sup>RIDC1<sup>red</sup> gives rise to two structurally distinct trimers: an “up-up-down” trimer (+Fe<sup>II</sup>) and an “up-up-up” trimer (+Ni<sup>II</sup>). The “up-up-down” trimer hosts His<sub>3</sub> and His<sub>5</sub> coordination sites in a square pyramidal geometry while the “up-up-up” trimer hosts His<sub>6</sub> sites in an octahedral geometry. According to crystal field theory, the crystal field stabilization energy (CFSE) of Ni<sup>II</sup> in an octahedral coordination environment is higher than that of Fe<sup>II</sup>. Correspondingly, our DFT calculations predict that altering the coordination environment in Ni<sup>II</sup> coordination complexes from square pyramidal His<sub>3</sub>/His<sub>5</sub> to octahedral His<sub>6</sub> imparts greater stability than it does in Fe<sup>II</sup> complexes (**Figure S13, Table S6**). Based on crystal field theory and DFT calculations, we surmise that Ni<sup>II</sup> is more likely than Fe<sup>II</sup> to direct protein assembly into an architecture that features octahedral His<sub>6</sub> coordination sites. Rotamer analysis of the His<sub>5</sub> coordination site of the “up-up-down” trimer reveals that the most probable metal coordinating rotamer of H77<sup>”</sup> gives rise to a His<sub>6</sub> environment that is more geometrically distorted than that of the “up-up-up” trimer (**Figure S14**). Correspondingly, this hypothetical site is predicted by DFT to be less thermodynamically stable by 116 kcal/mol (**Figure S14b-c, Table S6**). This result suggests that the “up-up-down” trimer, which hosts the Fe<sup>II</sup> coordination sites, is less effective at templating octahedral His<sub>6</sub> sites than the “up-up-up” trimer.

Interestingly, the “up-up-down” trimer is predicted by Rosetta calculations to be a more stable trimer based purely on non-covalent interactions (**Table S1, S5**). We can thus surmise that in the case of Ni<sup>II</sup>-directed assembly, the thermodynamic stabilization of the metal ion in an octahedral, His<sub>6</sub> coordination environment—which would bias trimerization into the “up-up-up” conformation—is greater than the thermodynamic stabilization provided by additional non-covalent interactions present in the “up-up-down” conformation. In the case of Fe<sup>II</sup>-directed assembly, the inverse is true.

In contrast to the Fe<sup>II</sup>- and Ni<sup>II</sup>-directed assemblies, the Zn<sup>II</sup>-directed assembly is a tetramer hosting four identical, tetrahedral His<sub>2</sub>GluCys coordination sites. According to the MetalPDB, 40% of natural Zn<sup>II</sup> metalloproteins feature coordinatively saturated, tetrahedral coordination sites.<sup>14</sup> By contrast, the frequencies of octahedral and square pyramidal geometries are only 7%.<sup>14</sup> Among coordinatively saturated, tetrahedral Zn<sup>II</sup> sites, 67% feature at least one cysteine in the primary sphere.<sup>14</sup> The bioinformatic data suggests that a tetrahedral His<sub>2</sub>GluCys primary sphere would be highly favorable for Zn<sup>II</sup> coordination. We also have observed tetrahedral Zn<sup>II</sup> coordination in many of our designed tetrameric assemblies, including Zn<sub>4</sub>:MBPC14 and Zn<sub>4</sub>:RIDC14.<sup>15, 16</sup>



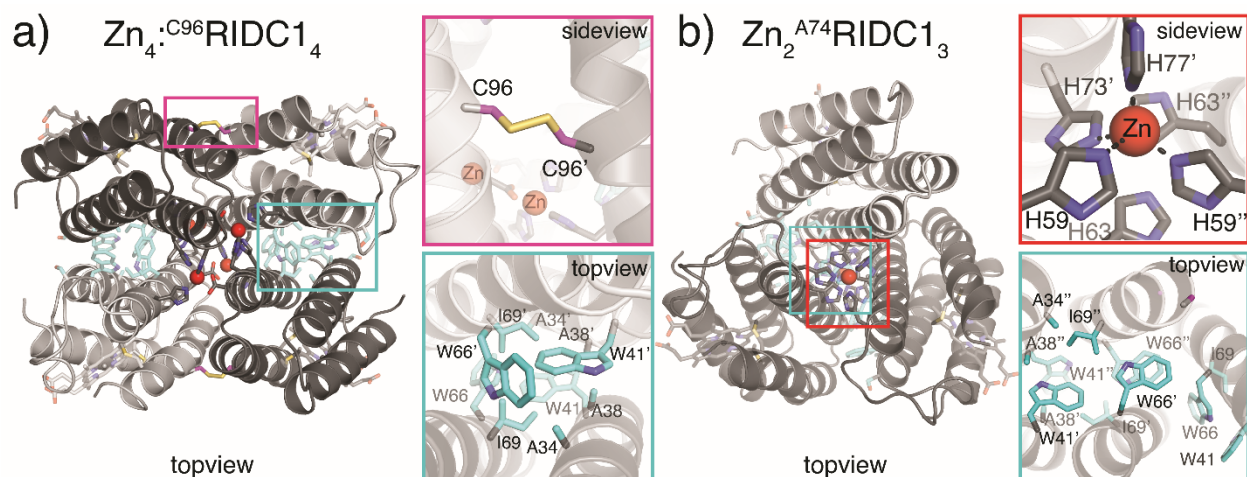

Figure S1. (a) Crystal structure of  $\text{Zn}_4^{\text{C96}}\text{RIDC1}_4$  (PDB ID: 3IQ6). One of the two C96-C96' disulphide bonds is highlighted in magenta while the designed hydrophobic residues are highlighted in cyan. (b) Crystal structure of  $\text{Zn}_2^{\text{A74}}\text{RIDC1}_3$  (PDB ID: 3M15). One of the two Zn:His<sub>4</sub> coordination sites is highlighted in red while the designed hydrophobic residues are highlighted in cyan.  $\text{C96}^{\text{RIDC1}}$  enforces the tetrameric architecture through covalent preorganization of the *i1* interface while  $\text{A74}^{\text{RIDC1}}$  features a decoupling of Zn binding to tetramerization. This decoupling takes place despite the presence of hydrophobic residues installed to stabilize a tetramer, which suggests that Zn coordination by D74 plays a valuable role in directing the tetramerization of RIDC1.

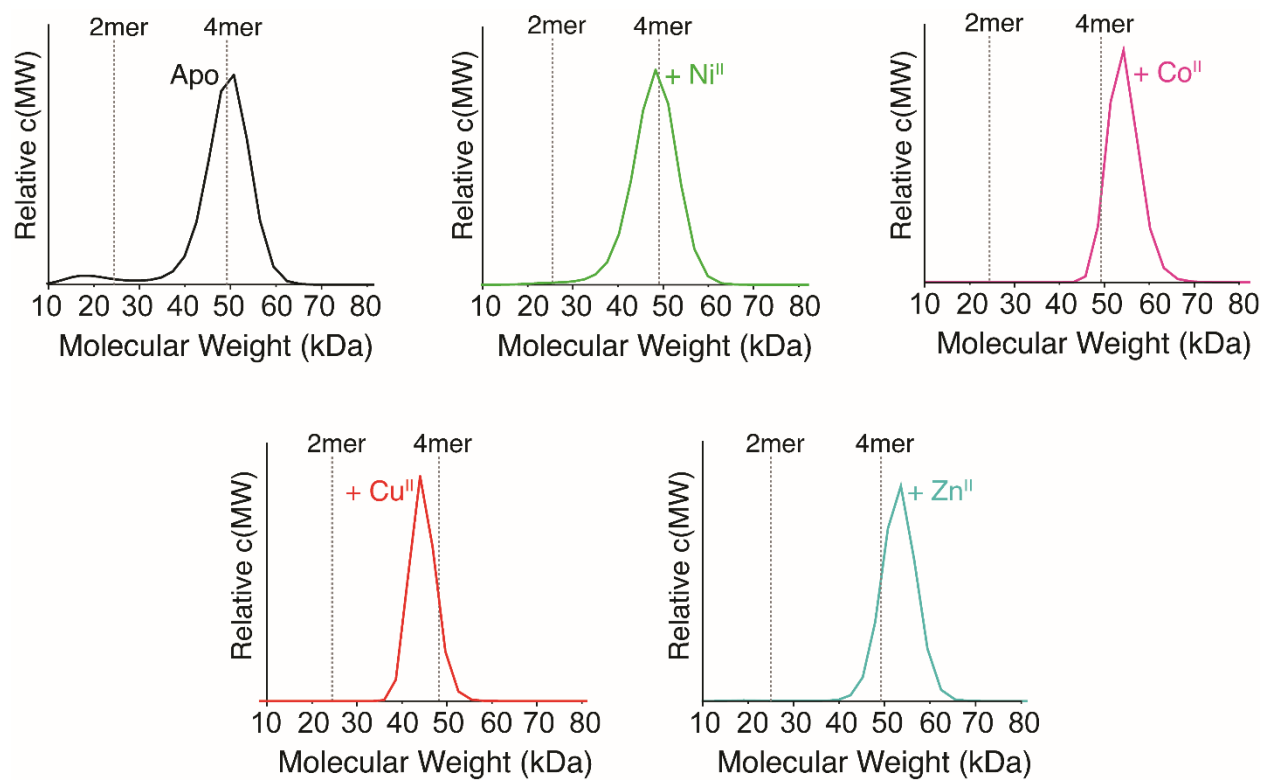

Figure S2. SV-AUC distributions of metal-supplemented <sup>A74/C96</sup>RIDC1<sup>ox</sup>. Analysis was performed with 200  $\mu$ M protein monomer and 1 equivalent metal salt.

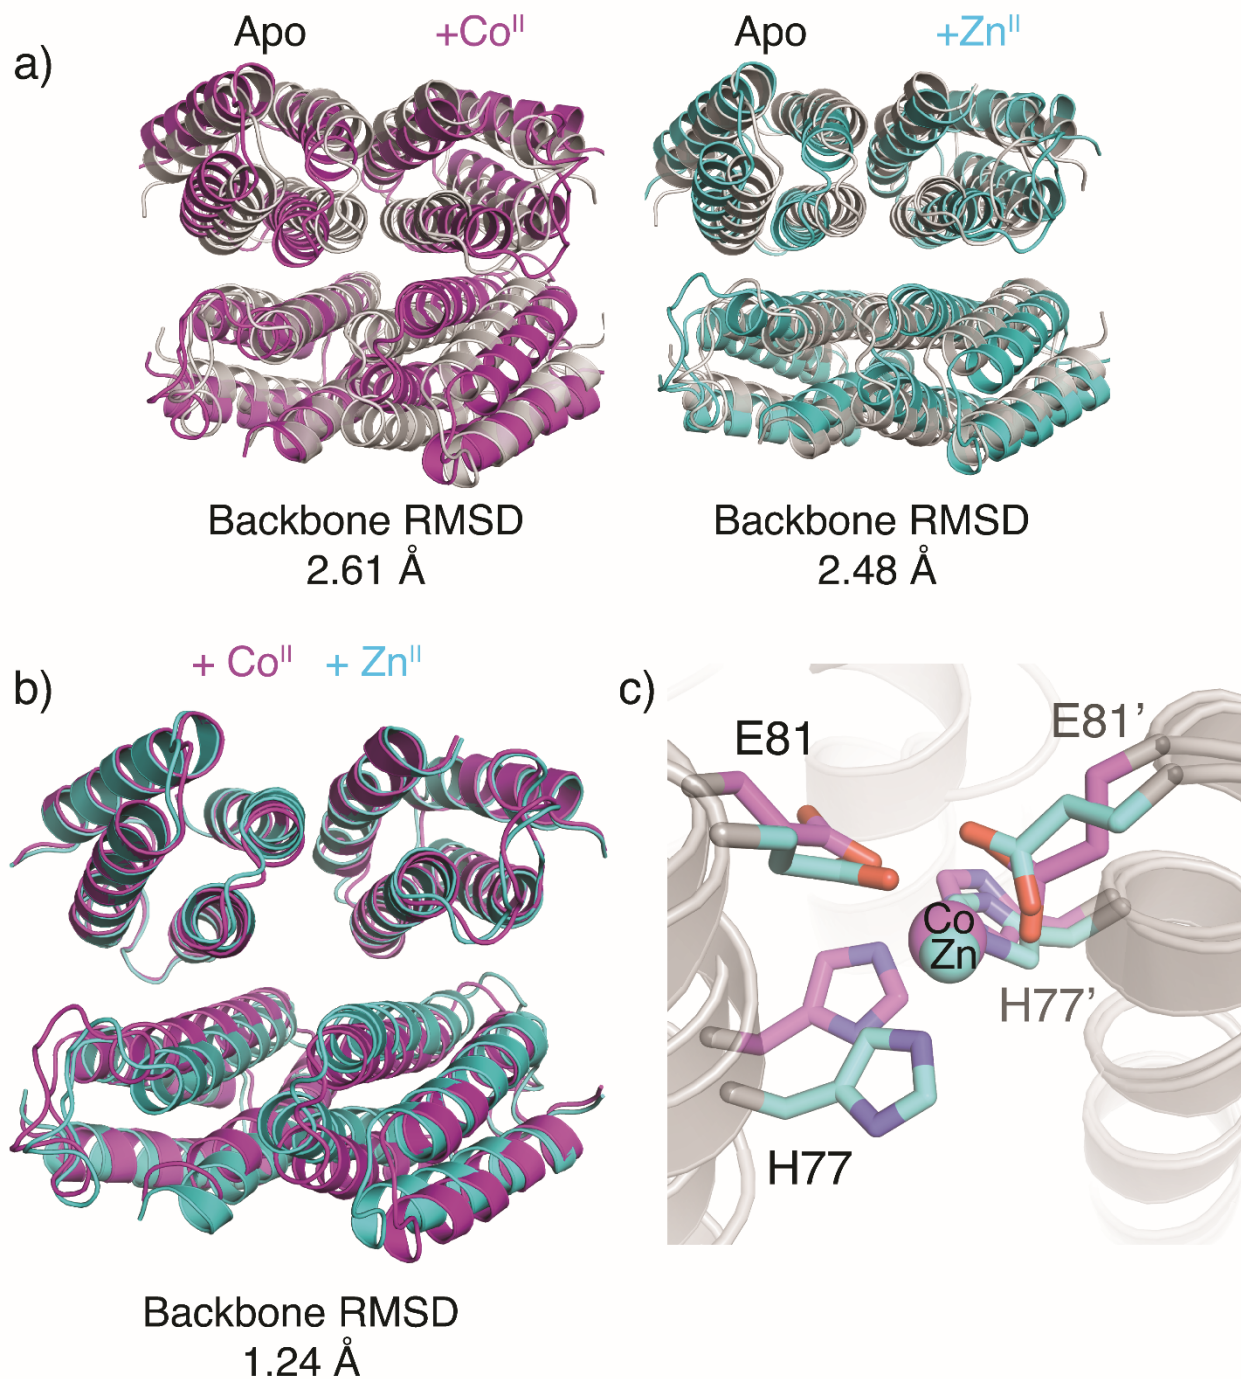

Figure S3. (a) Overlays of Apo, Co<sup>II</sup>-, and Zn<sup>II</sup>-bound <sup>A74/C96</sup>RIDC1<sup>ox</sup> crystal structures (b) Overlay of Co<sup>II</sup>-, and Zn<sup>II</sup>-bound <sup>A74/C96</sup>RIDC1<sup>ox</sup> crystal structures. (c) Overlay of C<sub>2</sub> coordination sites of the metal-loaded assemblies, illustrating close correlation in the positions of coordinating residues.

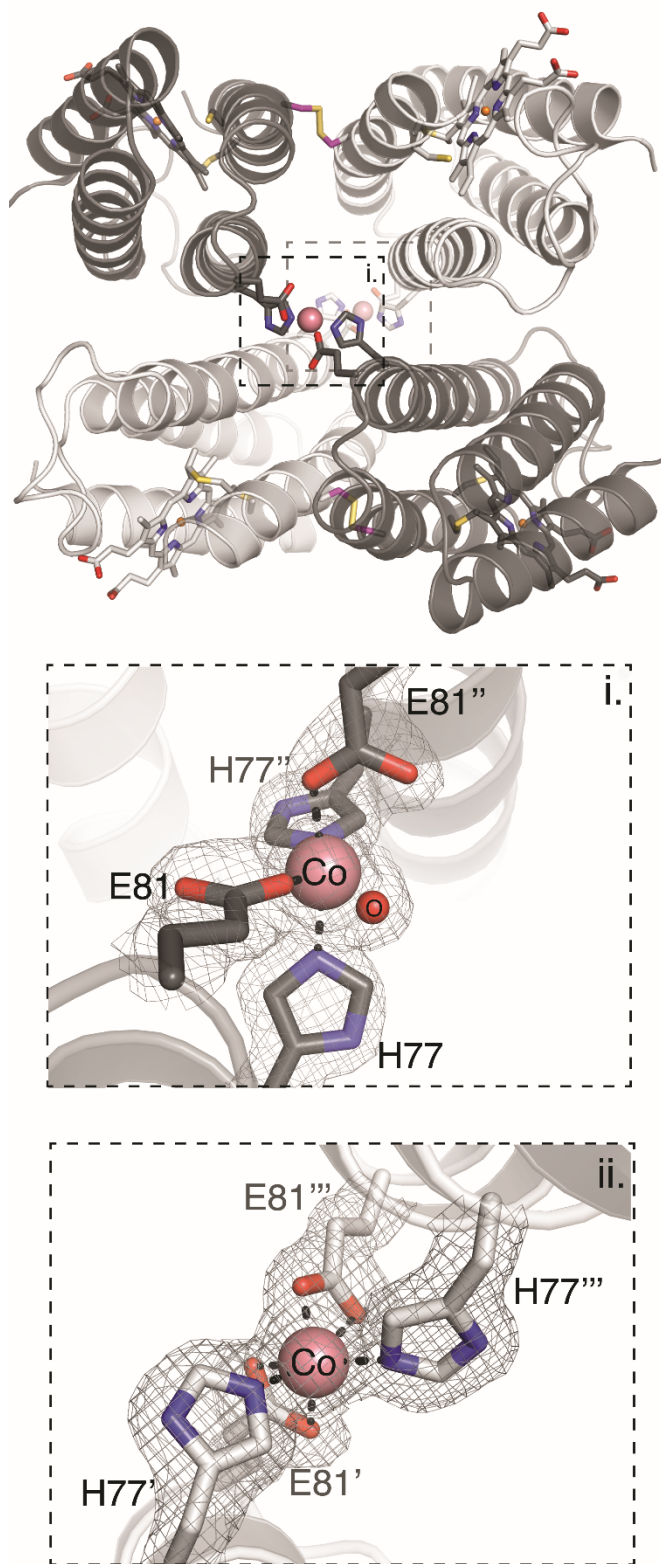

Figure S4. Overview of  $\text{Co}_2:[\text{A}^{74}/\text{C}^{96}\text{R1DC1}^{\text{ox}}]_4$  crystal structure, including 2Fo-2Fc maps of metal coordination sites. All electron density maps were generated in CCP4i.



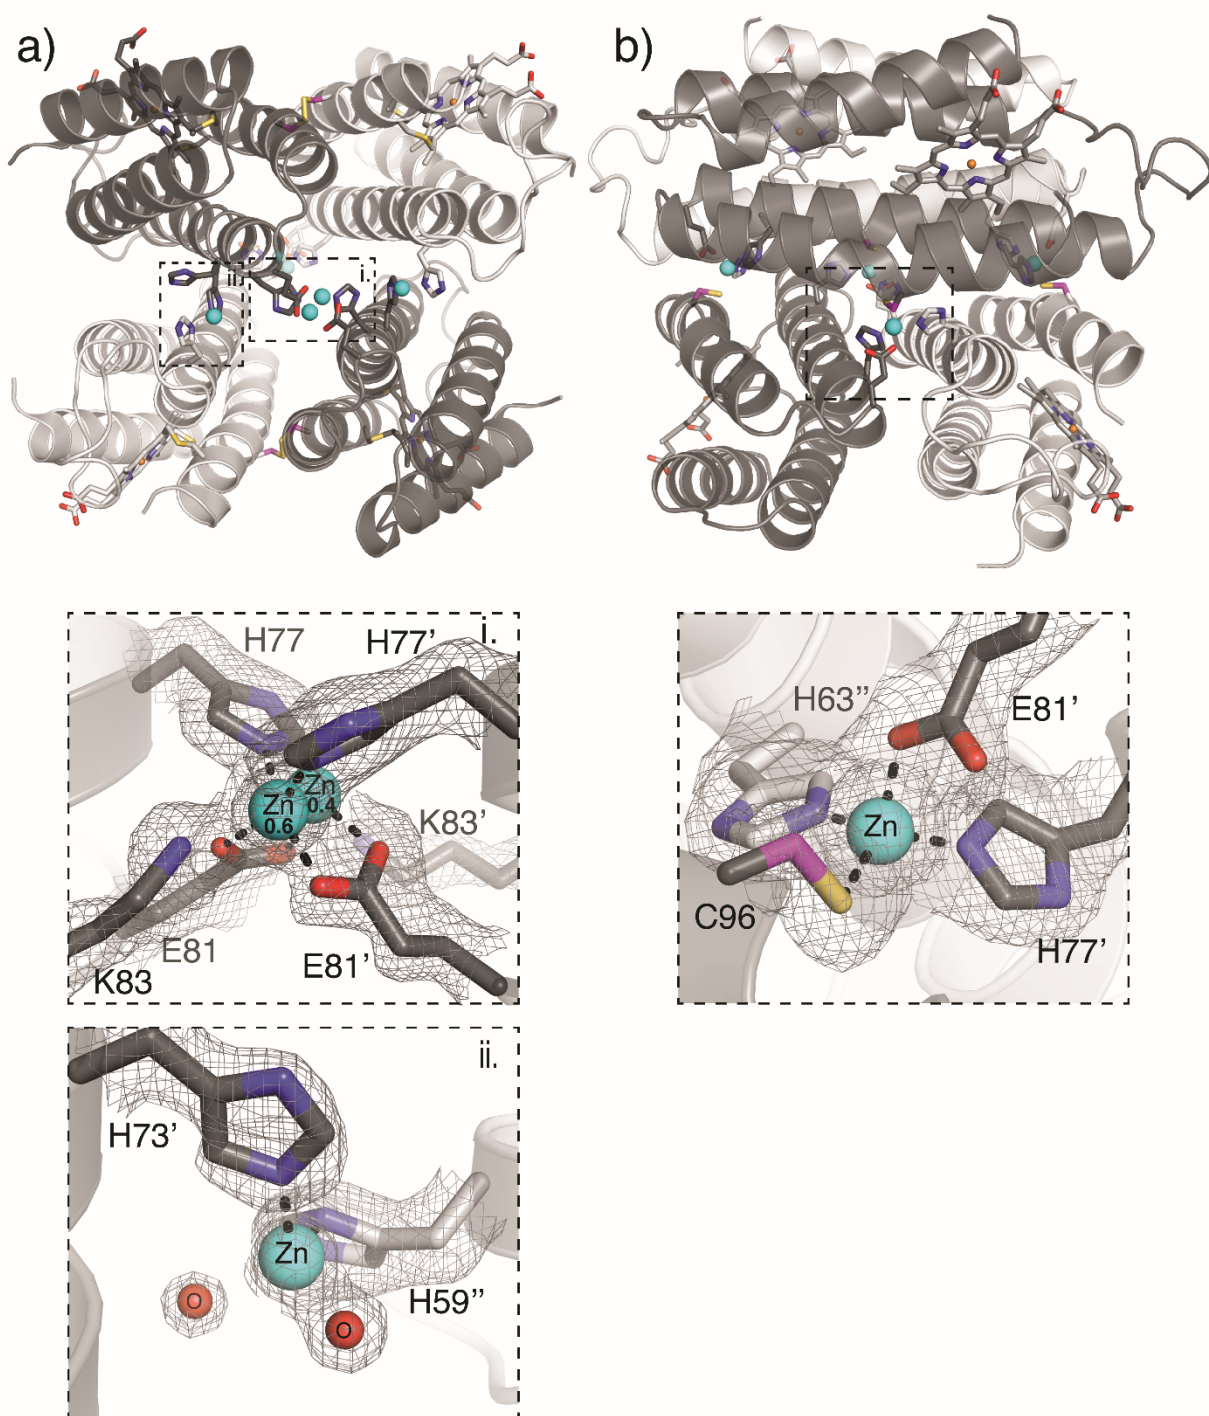

Figure S5. Overviews of (a) Zn<sub>4</sub>:[<sup>A74/C96</sup>RIDC1<sup>ox</sup>]<sub>4</sub> and (b) Zn<sub>4</sub>:[<sup>A74/C96</sup>RIDC1<sup>red</sup>]<sub>4</sub> crystal structures, including 2Fo-2Fc maps of metal coordination sites. At the first coordination site of Zn<sub>4</sub>:[<sup>A74/C96</sup>RIDC1<sup>ox</sup>]<sub>4</sub> (i), a single Zn ion occupies two discrete positions (occupancies in bold). K83 residues form close contacts (2.5 Å) with Zn, but this interaction cannot be unequivocally characterized as metal-ligand coordination and the pK<sub>a</sub> of K83 is unknown.

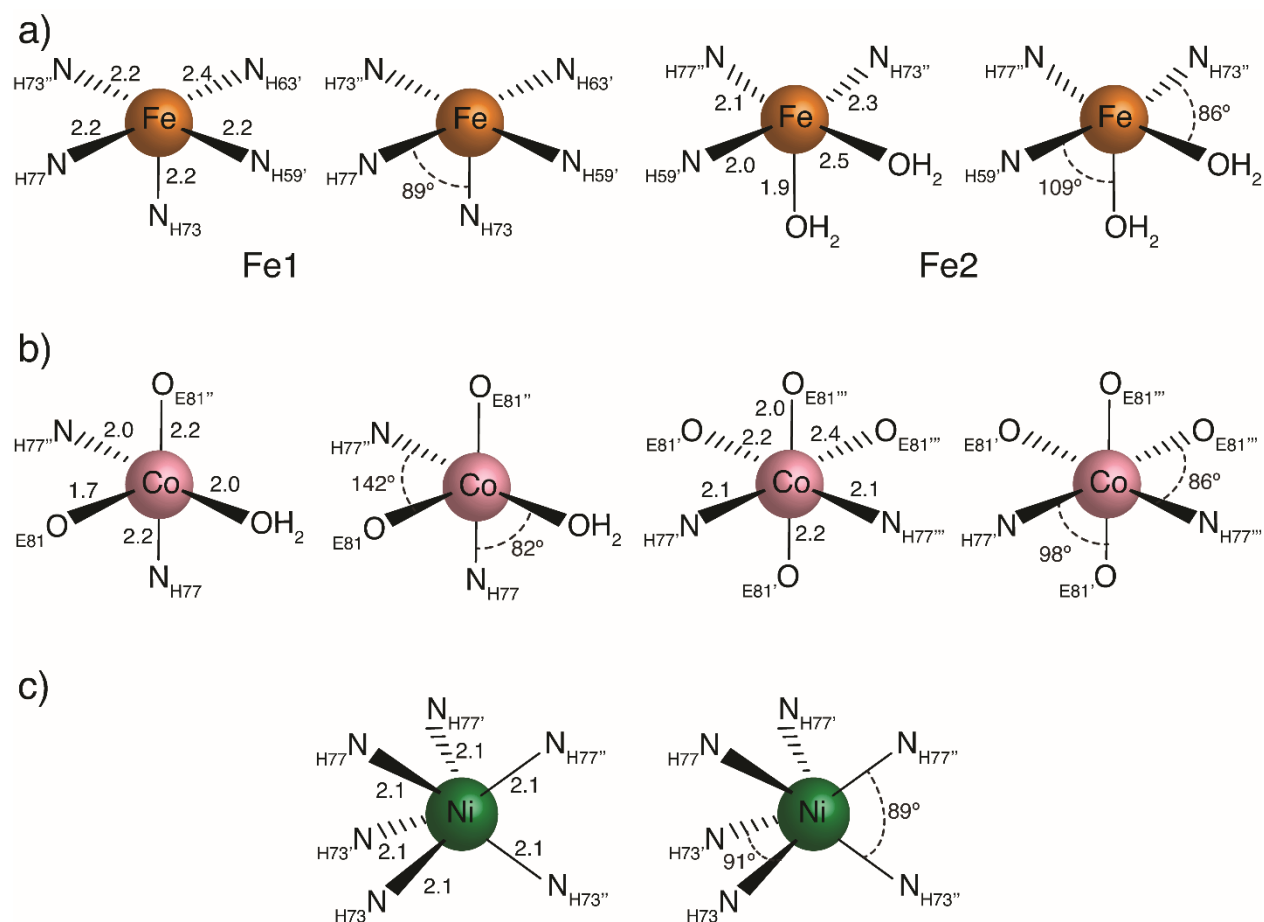

Figure S6. Geometries of coordination sites in (a)  $\text{Fe}_2\text{:}[\text{A}^{74}/\text{C}^{96}\text{RIDC1}^{\text{red}}]_3$ , (b)  $\text{Co}_2\text{:}[\text{A}^{74}/\text{C}^{96}\text{RIDC1}^{\text{ox}}]_4$ , and (c)  $\text{Ni}_2\text{:}[\text{A}^{74}/\text{C}^{96}\text{RIDC1}^{\text{red}}]_3$ , including bond distances and angles. Significant distortions from ideal coordination geometries are observed in all metal-bound structures other than  $\text{Ni}_2\text{:}[\text{A}^{74}/\text{C}^{96}\text{RIDC1}^{\text{red}}]_3$ .

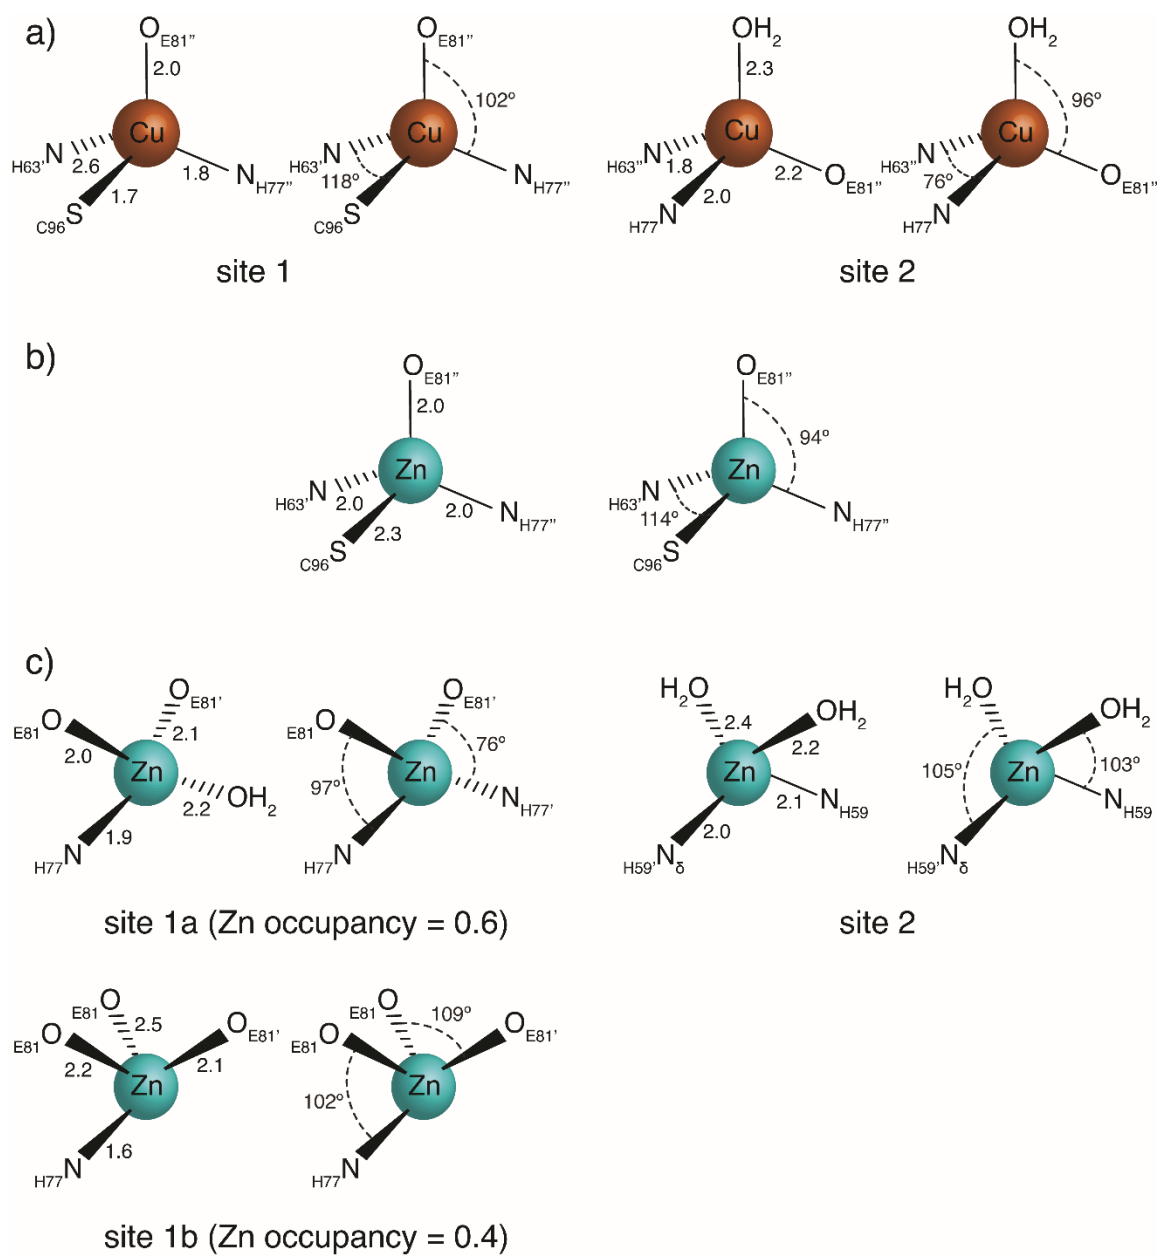

Figure S7. Geometries of coordination sites in (a)  $\text{Cu}_4\text{:}[\text{A}^{74}/\text{C}^{96}\text{RIDC1}^{\text{red}}]_4$ , (b)  $\text{Zn}_4\text{:}[\text{A}^{74}/\text{C}^{96}\text{RIDC1}^{\text{red}}]_4$ , and (c)  $\text{Zn}_4\text{:}[\text{A}^{74}/\text{C}^{96}\text{RIDC1}^{\text{ox}}]_4$ , including bond distances and angles.

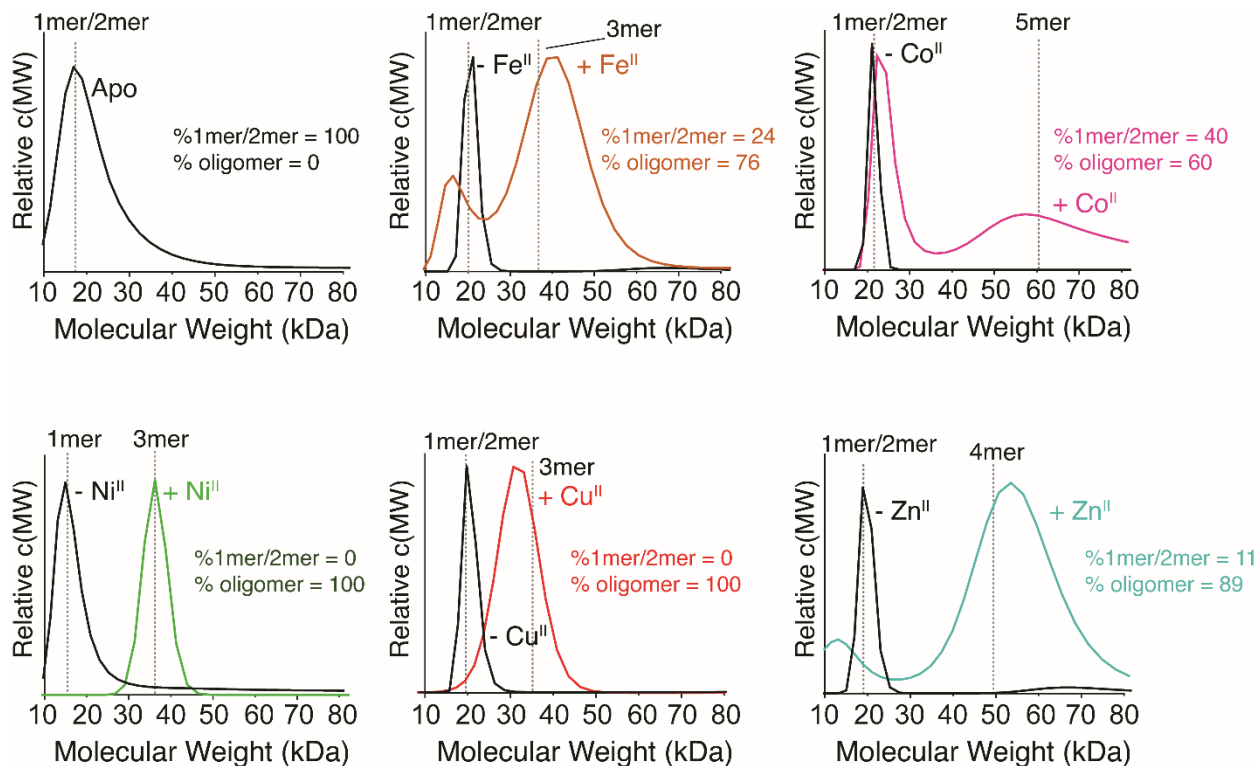

Figure S8. SV-AUC distributions of  $A74/C96RIDC1^{red}$  upon the addition/removal of metal ions. Analysis was performed with 200  $\mu$ M protein monomer and 1 equivalent ( $Co^{II}$ ,  $Ni^{II}$ ,  $Cu^{II}$ ,  $Zn^{II}$ ) or 5 equivalents ( $Fe^{II}$ ) metal salt. Metal ions were removed from the protein via the addition of 10 mM EDTA/DPA (black traces).



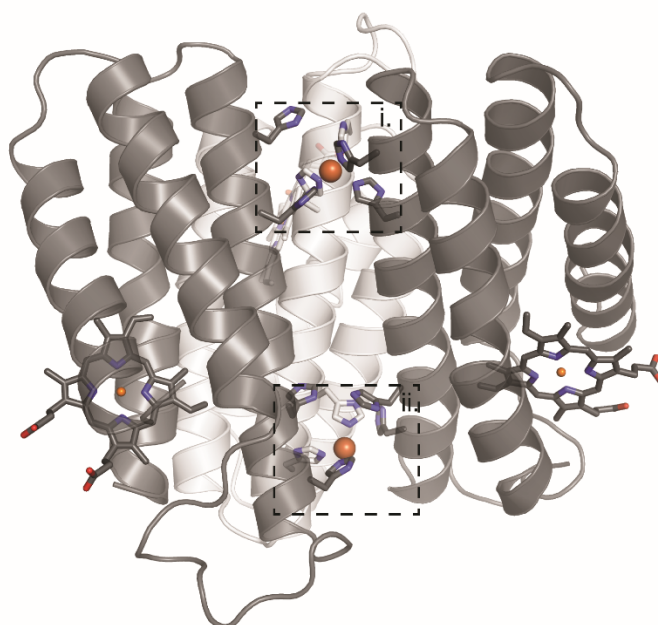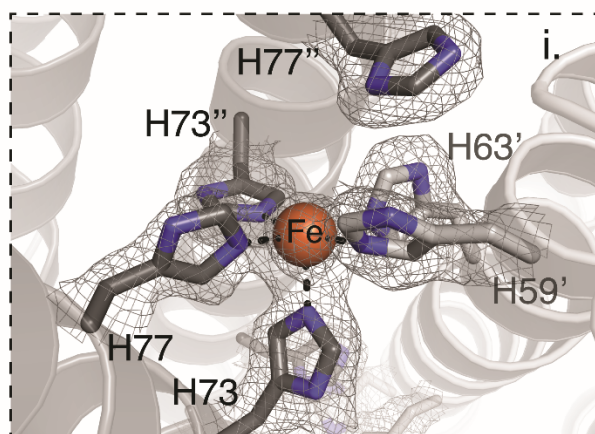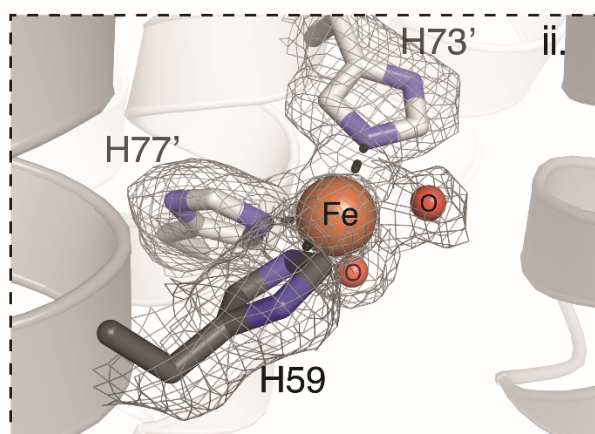

Figure S9. Overview of  $\text{Fe}_2\text{:}[\text{A}^{74}/\text{C}^{96}\text{RIDC1}^{\text{red}}]_3$  crystal structure, including 2Fo-2Fc maps of metal coordination sites. All electron density maps were generated in CCP4i.

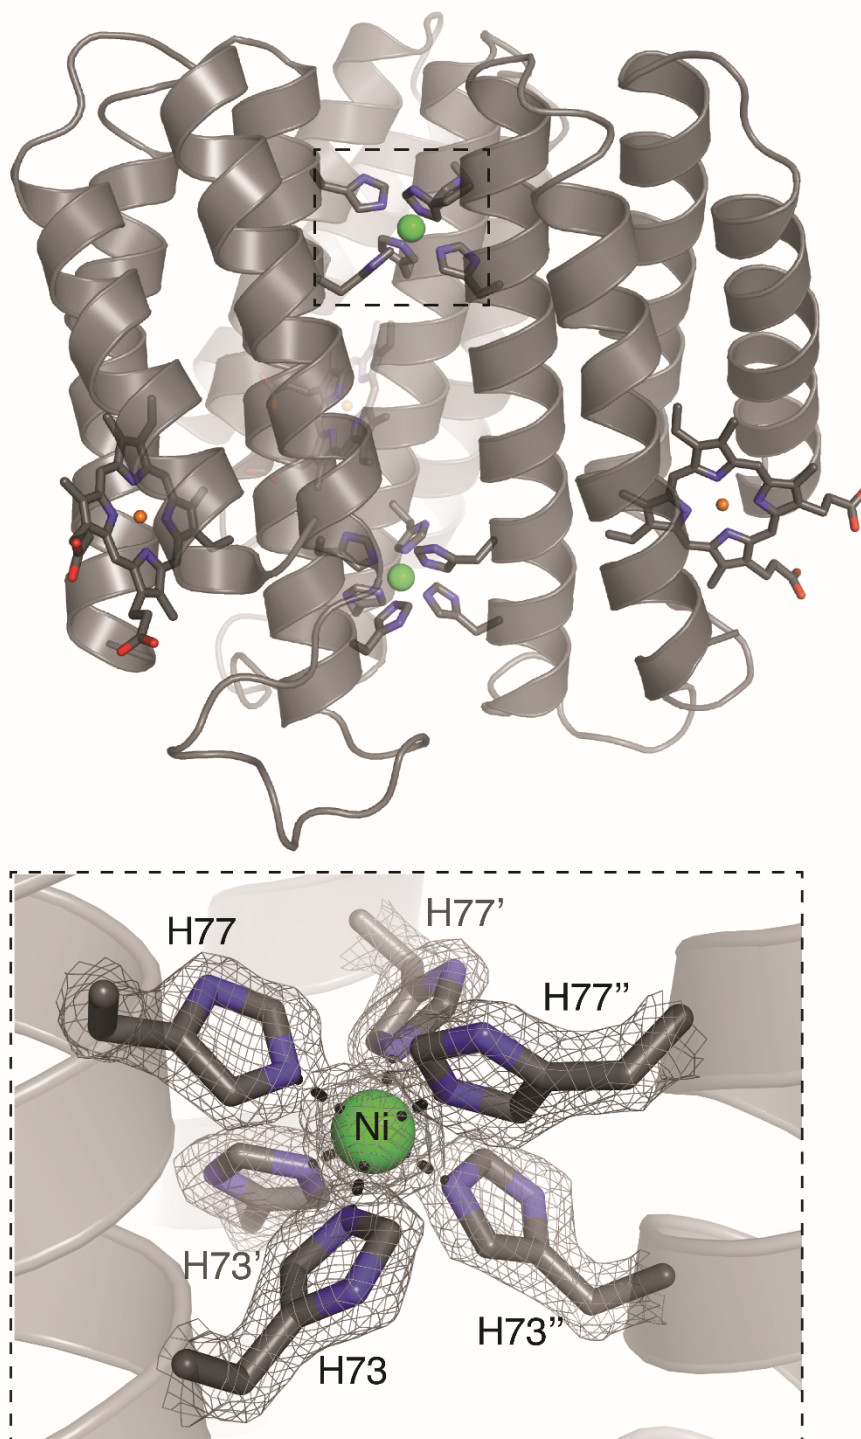

Figure S10. Overview of the  $\text{Ni}_2\text{:}[\text{A}^{74}/\text{C}^{96}\text{RIDC1}^{\text{red}}]_3$  crystal structure, including a 2Fo-2Fc map of one of the Ni:His<sub>6</sub> coordination sites. In accordance with the  $C_3$  symmetry of the assembly, the coordination sites are identical in terms of bond distances and angles.

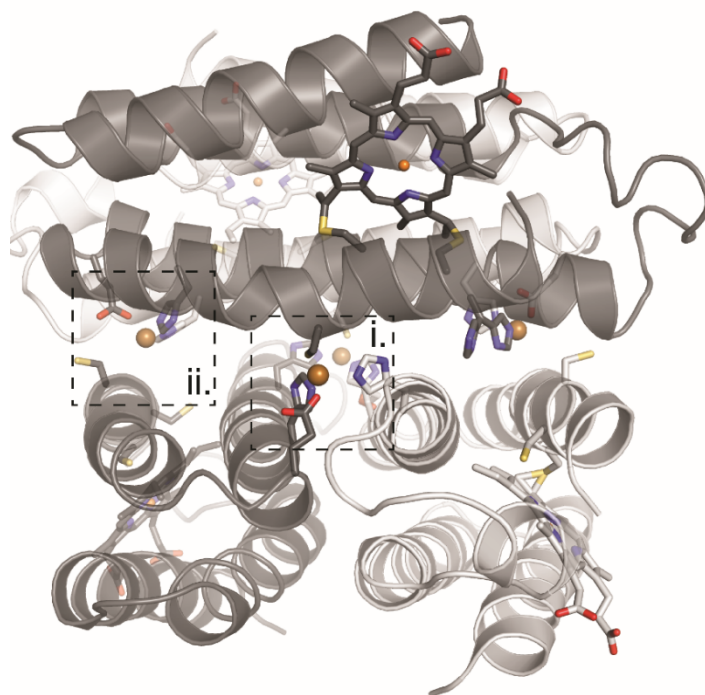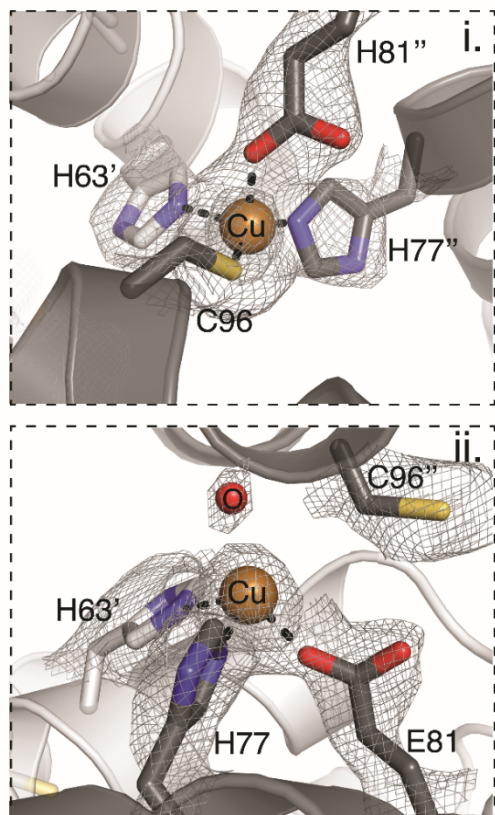

Figure S11. Overview of the  $\text{Cu}_4\text{:}[\text{A}^{74}/\text{C}^{96}\text{RIDC1}^{\text{red}}]_4$  crystal structure, including 2Fo-2Fc maps of metal coordination sites. The tetrahedral coordination geometry of the Cu ions suggests *in situ* reduction of copper ions by THPP to  $\text{Cu}^{\text{I}}$ , which is more frequently observed in these coordination environments.

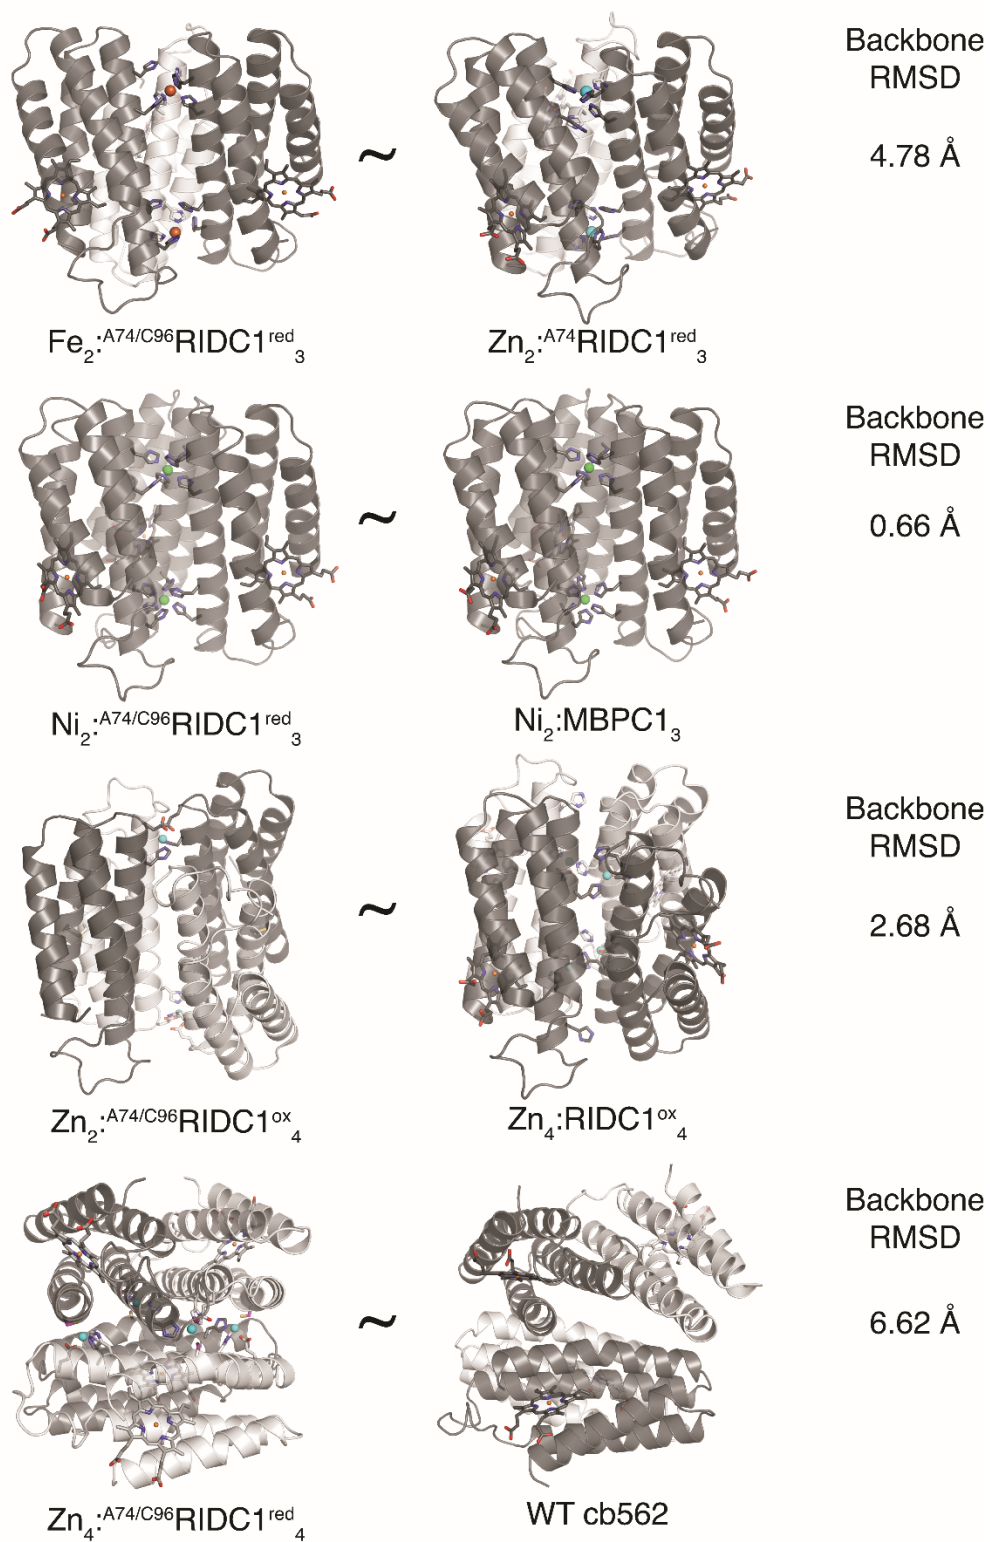

Figure S12. Comparison of metal-bound  $\text{A74/C96RIDC1}^{\text{red}}$  structures with other cytochrome *cb562* variants. Sequence-independent alignments were carried out in PYMOL.



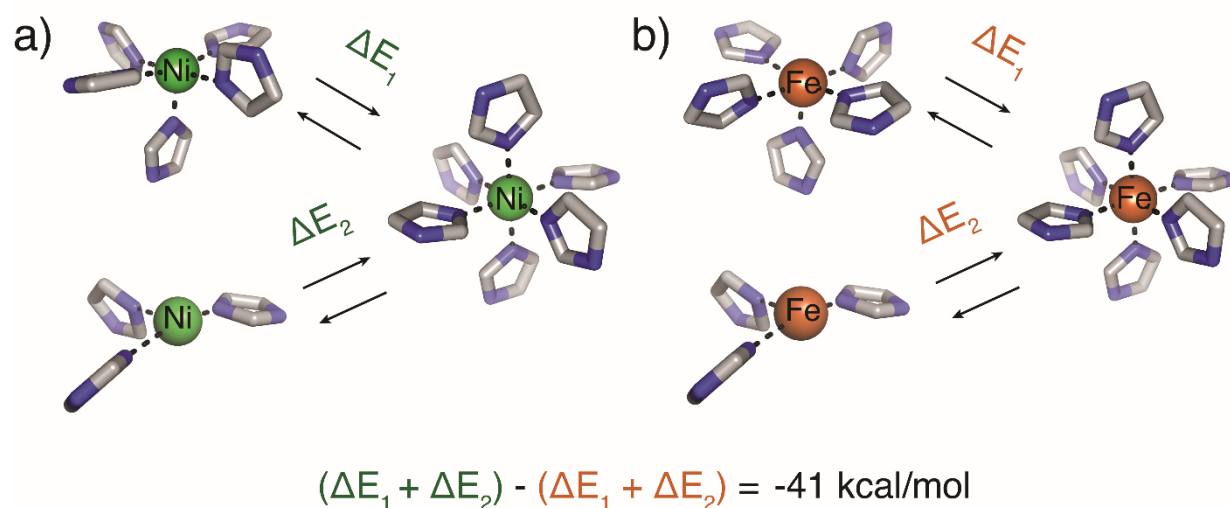

Figure S13: DFT calculations on the relative stability of His<sub>3</sub>, His<sub>5</sub>, and His<sub>6</sub> coordination environments at (a) Ni<sup>II</sup> and (b) Fe<sup>II</sup> centres. Prior to the calculations, Ni<sup>II</sup> was substituted into the Fe:His<sub>3</sub> and Fe:His<sub>5</sub> coordination sites extracted from the Fe<sub>2</sub>: [A<sup>74</sup>/C<sup>96</sup>RIDC1<sup>red</sup>]<sub>3</sub> crystal structure, while Fe<sup>II</sup> was substituted into one of the Ni<sup>II</sup>:His<sub>6</sub> coordination sites extracted from the Ni<sub>2</sub>: [A<sup>74</sup>/C<sup>96</sup>RIDC1<sup>red</sup>]<sub>3</sub> crystal structure. Calculations were performed without geometry optimization. The calculations predict that Ni<sup>II</sup> is more stabilized by His<sub>6</sub> coordination than Fe<sup>II</sup>, by 41 kcal/mol. We surmise that the relative stabilization of Ni<sup>II</sup> in a His<sub>6</sub> coordination environment is enough to bias trimerization in the “up-up-up” arrangement.

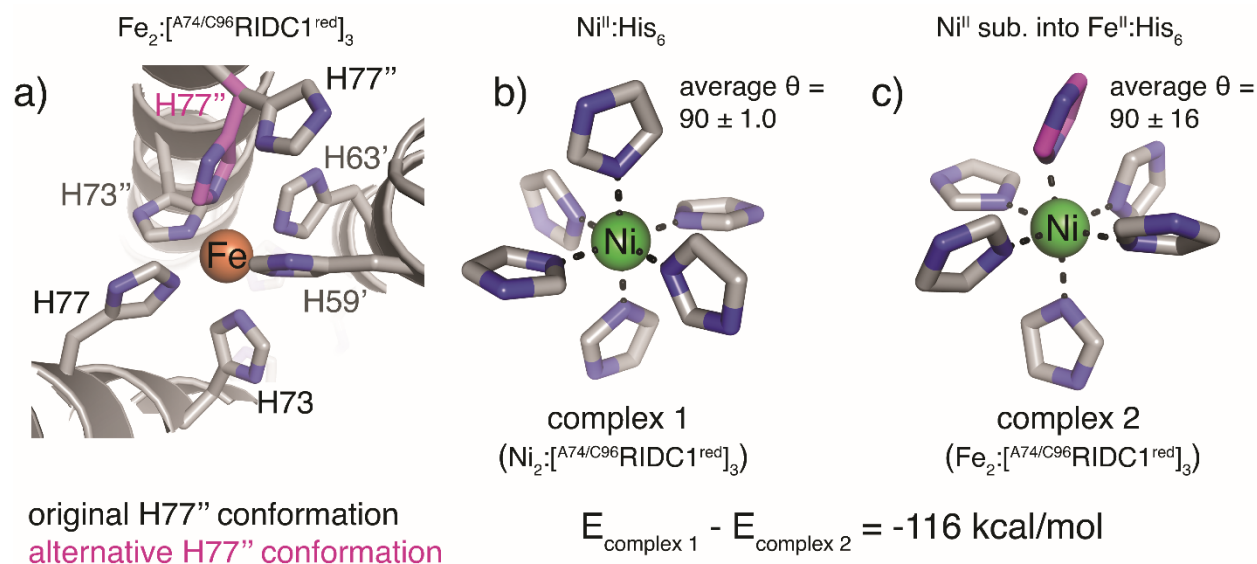

Figure S14: Modeling and DFT calculations of a hypothetical  $\text{His}_6$  coordination site in  $\text{Fe}_2\text{:}[\text{A}^{74}/\text{C}^{96}\text{RIDC1}^{\text{red}}]_3$ . (a) Overlay of coordination sites in the  $\text{Fe}^{\text{II}}$ -directed trimer with and without the alternative H77'' conformation that would give rise to a  $\text{Fe}^{\text{II}}\text{:His}_6$  site. The alternative conformation of H77'' (magenta) represents the highest probability rotamer within coordinating distance of  $\text{Fe}^{\text{II}}$  as predicted by the Dunbrack rotamer library. (b) Model of  $\text{Ni}^{\text{II}}\text{:His}_6$  in the  $\text{Ni}^{\text{II}}$ -directed trimer. (c) Model of the hypothetical  $\text{Fe}^{\text{II}}\text{:His}_6$  site in  $\text{Fe}_2\text{:}[\text{A}^{74}/\text{C}^{96}\text{RIDC1}^{\text{red}}]_3$  substituted with  $\text{Ni}^{\text{II}}$ . Significant deviations from ideal bond angles of an octahedral coordination geometry were observed in the hypothetical site, which led to a lower DFT-computed energy.

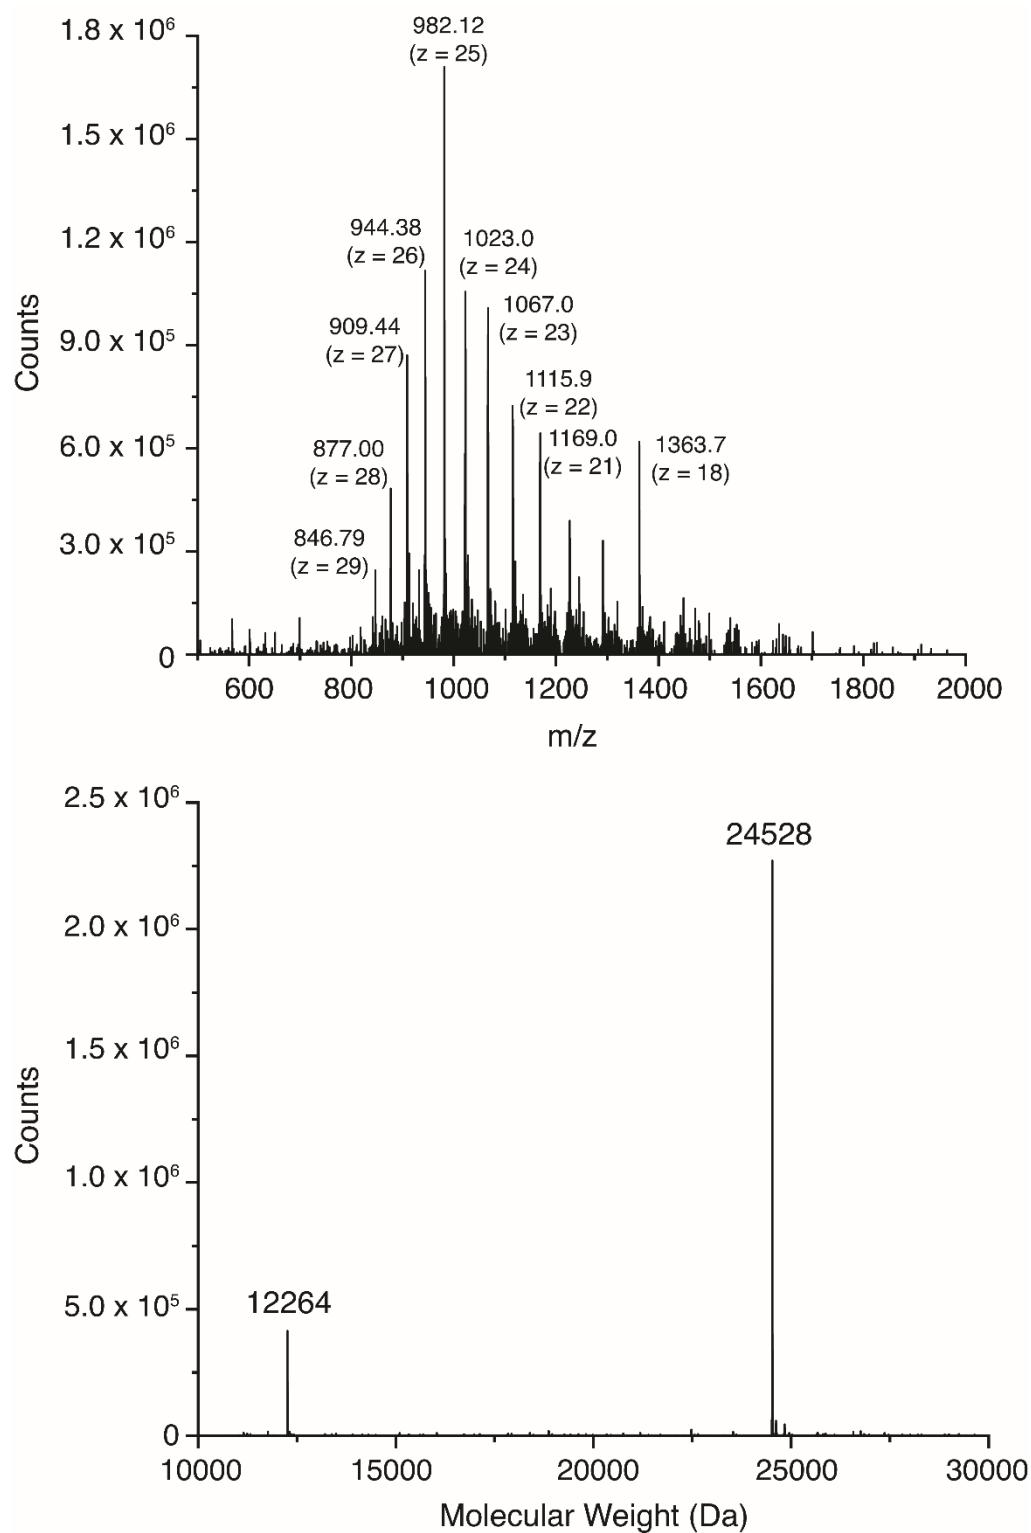

Figure S15. Convoluted (top) and deconvoluted (bottom) ESI-MS spectra of  $A_{74}/C_{96}RIDC1^{ox}$ . Charge states and m/z values in the convoluted spectrum correspond to the dimer.

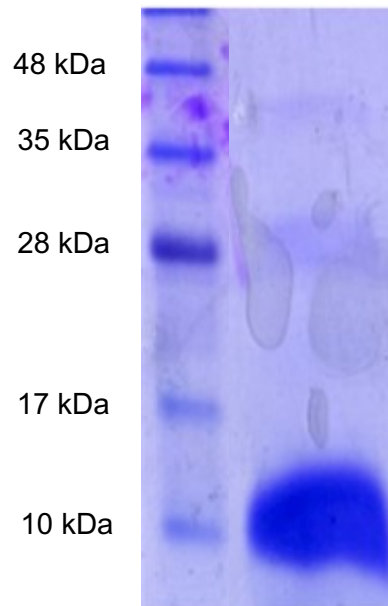

Figure S16. Denaturing SDS-PAGE gel of <sup>A74/C96</sup>RIDC1. The gel was run at 200 V for 45 minutes and under reducing conditions.



Table S1. Buried surface area (BSA) calculations of RIDC1 assemblies<sup>[a]</sup>

| Variant      | Reductant | Metal | BSA/monomer (Å <sup>2</sup> ) |
|--------------|-----------|-------|-------------------------------|
| A74/C96RIDC1 | -         | -     | 1665                          |
| A74/C96RIDC1 | -         | Co    | 968                           |
| A74/C96RIDC1 | -         | Zn    | 1068                          |
| A74/C96RIDC1 | THPP      | Fe    | 1038                          |
| A74/C96RIDC1 | THPP      | Ni    | 768                           |
| A74/C96RIDC1 | THPP      | Cu    | 1743                          |
| A74/C96RIDC1 | THPP      | Zn    | 1650                          |
| C96RIDC1     | -         | -     | 1063                          |
| C96RIDC1     | -         | Zn    | 1388                          |
| A74RIDC1     | -         | Zn    | 1007                          |

[a] BSA calculations based on crystal structures

Table S2. SV-AUC parameters for apo, metal-loaded <sup>A74/C96</sup>RIDC1<sup>[a]</sup>

| Reductant <sup>[b]</sup> | Metal <sup>[c]</sup>             | Frictional Ratio<br>(f/f <sub>0</sub> ) | MW <sub>max</sub> (kDa) <sup>[d]</sup> |
|--------------------------|----------------------------------|-----------------------------------------|----------------------------------------|
| -                        | -                                | 1.31                                    | 51                                     |
| -                        | CoCl <sub>2</sub>                | 1.20                                    | 54                                     |
| -                        | NiCl <sub>2</sub>                | 1.20                                    | 48                                     |
| -                        | CuCl <sub>2</sub>                | 1.21                                    | 44                                     |
| -                        | ZnCl <sub>2</sub>                | 1.12                                    | 54                                     |
| THPP                     | -                                | 1.20                                    | 17                                     |
| THPP                     | FeSO <sub>4</sub> <sup>[e]</sup> | 1.37                                    | 41                                     |
| THPP                     | CoCl <sub>2</sub>                | 1.16                                    | 22                                     |
| THPP                     | NiCl <sub>2</sub>                | 1.21                                    | 33                                     |
| THPP                     | CuCl <sub>2</sub>                | 1.21                                    | 31                                     |
| THPP                     | ZnCl <sub>2</sub>                | 1.19                                    | 54                                     |

[a] [protein monomer] = 0.2 mM monomer

[b] [THPP] = 1 mM

[c] Unless otherwise indicated, [metal] = 0.2 mM

[d] Theoretical MW = 12258 (monomer), 24516 (dimer), 36774 (trimer), 49032 (tetramer)

[e] [FeSO<sub>4</sub>] = 1 mM

Table S3. X-ray refinement statistics for <sup>A74/C96</sup>RIDC1 crystal structures.  
Numbers in parentheses correspond to values in the highest resolution shell.

| Variant                              | <sup>Apo</sup><br>[ <sup>A74/C96</sup> RIDC1 <sup>ox</sup> ] <sub>4</sub> | <sup>Co<sub>2</sub></sup><br>[ <sup>A74/C96</sup> RIDC1 <sup>ox</sup> ] <sub>4</sub> | <sup>Zn<sub>4</sub></sup><br>[ <sup>A74/C96</sup> RIDC1 <sup>ox</sup> ] <sub>4</sub> | <sup>Fe<sub>2</sub></sup><br>[ <sup>A74/C96</sup> RIDC1 <sup>red</sup> ] <sub>3</sub> |
|--------------------------------------|---------------------------------------------------------------------------|--------------------------------------------------------------------------------------|--------------------------------------------------------------------------------------|---------------------------------------------------------------------------------------|
| <b>PDB ID</b>                        | 7RWV                                                                      | 7SU2                                                                                 | 7RWW                                                                                 | 7RWY                                                                                  |
| Space group                          | <i>I</i> 4                                                                | <i>P</i> 2 <sub>1</sub>                                                              | <i>P</i> 2 <sub>1</sub>                                                              | <i>P</i> 2 <sub>1</sub>                                                               |
| Cell dimensions (Å)                  | 92.58, 92.58, 91.26                                                       | 47.88 90.02 52.04                                                                    | 47.79, 86.91, 49.18                                                                  | 52.55, 82.68, 74.14                                                                   |
| Cell angles (°)                      | 90.00, 90.00, 90.00                                                       | 90.00 95.91 90.00                                                                    | 90.00, 109.16, 90.00                                                                 | 90.00, 95.22, 90.00                                                                   |
| Resolution (Å)                       | 46.29-2.20                                                                | 37.00-2.00                                                                           | 35.96-1.70                                                                           | 44.65-2.20                                                                            |
| No. unique reflections               | 19413                                                                     | 29302                                                                                | 40172                                                                                | 30358                                                                                 |
| R <sub>merge</sub>                   | 0.150 (0.544)                                                             | 0.017 (0.059)                                                                        | 0.115 (0.752)                                                                        | 0.096 (0.374)                                                                         |
| Multiplicity                         | 2.5 (2.6)                                                                 | 2.0 (2.0)                                                                            | 14.8 (10.9)                                                                          | 3.9 (3.8)                                                                             |
| CC <sub>1/2</sub>                    | 0.984 (0.363)                                                             | 1 (0.989)                                                                            | 0.996 (0.617)                                                                        | 0.992 (0.863)                                                                         |
| < I / σ(I) >                         | 3.7 (1.9)                                                                 | 26.7 (7.4)                                                                           | 11.7 (3.2)                                                                           | 8.0 (2.8)                                                                             |
| Completeness (%)                     | 98.0 (98.7)                                                               | 98.4 (96.0)                                                                          | 99.9 (99.5)                                                                          | 99.1 (99.7)                                                                           |
| <b>Refinement</b>                    |                                                                           |                                                                                      |                                                                                      |                                                                                       |
| R <sub>work</sub> /R <sub>free</sub> | 0.1946/0.2520                                                             | 0.1904/0.1915                                                                        | 0.1704/0.2020                                                                        | 0.2023/0.2592                                                                         |
| B-factors (Å <sup>2</sup> )          | 34.36                                                                     | 34.32                                                                                | 29.84                                                                                | 39.71                                                                                 |
| Protein                              | 34.76                                                                     | 34.37                                                                                | 29.15                                                                                | 39.64                                                                                 |
| Ligand/ion                           | 28.36                                                                     | 29.71                                                                                | 29.63                                                                                | 39.86                                                                                 |
| Solvent                              | 32.76                                                                     | 37.65                                                                                | 39.39                                                                                | 41.08                                                                                 |
| R.m.s deviations                     |                                                                           |                                                                                      |                                                                                      |                                                                                       |
| Bond lengths (Å)                     | 0.016                                                                     | 0.009                                                                                | 0.012                                                                                | 0.009                                                                                 |
| Bond angles (°)                      | 1.871                                                                     | 1.150                                                                                | 1.123                                                                                | 1.159                                                                                 |
| Clashscore                           | 16.87                                                                     | 7.63                                                                                 | 10.23                                                                                | 19.73                                                                                 |
| Ramachandran plot (%)                |                                                                           |                                                                                      |                                                                                      |                                                                                       |
| Favored                              | 99.76                                                                     | 97.84                                                                                | 99.76                                                                                | 97.44                                                                                 |
| Outliers                             | 0.00                                                                      | 0.00                                                                                 | 0.00                                                                                 | 0.16                                                                                  |
| Rotamer outliers (%)                 | 0.00                                                                      | 2.60                                                                                 | 0.29                                                                                 | 1.99                                                                                  |

Table S3 (continued). X-ray refinement statistics for  $A74/C96$ RIDC1 crystal structures. Numbers in parentheses correspond to values in the highest resolution shell.

| <b>Variant</b>                  | $[A74/C96Ni_2:RIDC1^{red}]_3$ | $[A74/C96Cu_4:RIDC1^{red}]_4$ | $[A74/C96Zn_4:RIDC1^{red}]_4$ |
|---------------------------------|-------------------------------|-------------------------------|-------------------------------|
| <b>PDB ID</b>                   | 7RWU                          | 7TEP                          | 7RWX                          |
| Space group                     | $P4_132$                      | $P2_1$                        | $R\ 3\ 2$                     |
| Cell dimensions (Å)             | 94.26, 94.26, 94.26           | 47.08 80.57 49.44             | 111.65, 111.65, 148.33        |
| Cell angles (°)                 | 90.00, 90.00, 90.00           | 90.00 102.33, 90.00           | 90.00, 90.00, 120.00          |
| Resolution (Å)                  | 42.15-1.80                    | 45.99-2.70                    | 37.01-1.60                    |
| No. unique reflections          | 25101                         | 9589                          | 27879                         |
| $R_{merge}$                     | 0.069 (0.191)                 | 0.0571 (0.146)                | 0.055                         |
| Multiplicity                    | 68.0 (68.5)                   | 3.3 (3.3)                     | 4.1 (3.7)                     |
| CC $\frac{1}{2}$                | 1.000 (0.998)                 | 0.998 (0.953)                 | 0.995 (0.898)                 |
| $\langle I / \sigma(I) \rangle$ | 58.1 (28.2)                   | 16.66 (6.50)                  | 8.5 (2.7)                     |
| Completeness (%)                | 100.0 (100.0)                 | 95.9 (89.6)                   | 96.2 (91.3)                   |
| <b>Refinement</b>               |                               |                               |                               |
| $R_{work}/R_{free}$             | 0.1641/0.1892                 | 0.2536/0.3385                 | 0.2369/0.2897                 |
| B-factors (Å <sup>2</sup> )     | 23.60                         | 28.62                         | 50.21                         |
| Protein                         | 21.49                         | 28.66                         | 50.60                         |
| Ligand/ion                      | 16.75                         | 28.86                         | 44.24                         |
| Solvent                         | 36.29                         | 26.39                         | 49.03                         |
| R.m.s deviations                |                               |                               |                               |
| Bond lengths (Å)                | 0.010                         | 0.019                         | 0.008                         |
| Bond angles (°)                 | 0.994                         | 1.960                         | 1.006                         |
| Clashscore                      | 15.07                         | 51.51                         | 10.12                         |
| Ramachandran plot (%)           |                               |                               |                               |
| Favored                         | 99.04                         | 77.88                         | 98.08                         |
| Outliers                        | 0.00                          | 6.75                          | 0.00                          |
| Rotamer outliers (%)            | 0.00                          | 10.5                          | 4.22                          |

Table S4. Crystallization conditions for apo, metal-loaded <sup>A74/C96</sup>RIDC1

| Reductant <sup>[a]</sup> | Metal             | [Protein] <sup>[b]</sup> | [Metal] | Mother liquor                                           |
|--------------------------|-------------------|--------------------------|---------|---------------------------------------------------------|
| -                        | -                 | 2.6 mM                   | -       | 30% PEG400, 0.1 M HEPES pH 7.5, 0.2 M MgCl <sub>2</sub> |
| -                        | CoCl <sub>2</sub> | 3.0 mM                   | 3.0 mM  | 30% PEG400, 0.1 M HEPES pH 7.5, 0.2 M NaCl              |
| -                        | ZnCl <sub>2</sub> | 2.6 mM                   | 2.6 mM  | 45% MPD, 0.1 M HEPES pH 7.5, 0.2 M MgCl <sub>2</sub>    |
| THPP <sup>[a]</sup>      | FeSO <sub>4</sub> | 2.8 mM                   | 9.0 mM  | 40% PPG, 0.1 M Bis-Tris 6.5, no salt                    |
| THPP <sup>[a]</sup>      | NiCl <sub>2</sub> | 2.6 mM                   | 4.8 mM  | 45% MPD, 0.1 M Tris pH 8.5, 0.2 M MgCl <sub>2</sub>     |
| THPP <sup>[a]</sup>      | CuCl <sub>2</sub> | 3.0 mM                   | 3.0 mM  | 25% PEG1500, 0.1 M Bis-Tris pH 6.5, 0.2 M AmA           |
| THPP <sup>[a]</sup>      | ZnCl <sub>2</sub> | 2.6 mM                   | 5.0 mM  | 30% PEG400, 0.1 M HEPES pH 7.5, 0.2 M CaCl <sub>2</sub> |

[a] [THPP] = 10 mM

[b] Indicates monomer concentration

Table S5. Rosetta Interface Energy Calculations<sup>[a]</sup>

| Structure                                                 | Trimer Energy (REU) | Monomer Energy (REU) | Trimer-Monomer Energy (REU) |
|-----------------------------------------------------------|---------------------|----------------------|-----------------------------|
| Ni <sub>2</sub> :[ <sup>A74/C96</sup> RIDC1] <sub>3</sub> | -515.20             | -539.44              | 24.25                       |
| Fe <sub>2</sub> :[ <sup>A74/C96</sup> RIDC1] <sub>3</sub> | 221.29              | 246.37               | -25.08                      |

[a] Excludes energetic contribution of coordinating histidine residues and metal ions

Table S6. DFT-computed energies of metal coordination sites<sup>[a]</sup>

| Protein                     | Coordination Site                               | Multiplicity | Overall Charge | Energy (B3LYP) <sup>[b],[c]</sup> |
|-----------------------------|-------------------------------------------------|--------------|----------------|-----------------------------------|
| A74/C96RIDC1 <sup>red</sup> | Fe <sup>II</sup> :His <sub>3</sub>              | 5            | +2             | -2093.28                          |
| A74/C96RIDC1 <sup>red</sup> | Fe <sup>II</sup> :His <sub>5</sub>              | 5            | +2             | -2394.33                          |
| A74/C96RIDC1 <sup>red</sup> | Fe <sup>II</sup> :His <sub>6</sub>              | 5            | +2             | -2620.57                          |
| A74/C96RIDC1 <sup>red</sup> | Ni <sup>II</sup> :His <sub>3</sub>              | 3            | +2             | -2337.81                          |
| A74/C96RIDC1 <sup>red</sup> | Ni <sup>II</sup> :His <sub>5</sub>              | 3            | +2             | -2638.86                          |
| A74/C96RIDC1 <sup>red</sup> | Ni <sup>II</sup> :His <sub>6</sub>              | 3            | +2             | -2865.13                          |
| A74/C96RIDC1 <sup>red</sup> | Ni <sup>II</sup> :His <sub>6</sub> (alt. conf.) | 3            | +2             | -2864.94                          |

[a] Coordination sites extracted from crystal structures and without geometry optimization

[b] Energies reported in hartrees.

[c] 1 hartree = 627.50 kcal/mol

## References

1. E. N. Salgado, X. I. Ambroggio, J. D. Brodin, R. A. Lewis, B. Kuhlman and F. A. Tezcan, *Proc Natl Acad Sci U S A*, 2010, **107**, 1827-1832.
2. H. Liu and J. H. Naismith, *BMC Biotechnol*, 2008, **8**, 91.
3. J. Faraone-Mennella, F. A. Tezcan, H. B. Gray and J. R. Winkler, *Biochemistry*, 2006, **45**, 10504-10511.
4. P. Schuck, *Biophys J*, 2000, **78**, 1606-1619.
5. J. Lebowitz, M. S. Lewis and P. Schuck, *Protein Sci*, 2002, **11**, 2067-2079.
6. N. Collaborative Computational Project, *Acta Crystallogr D Biol Crystallogr*, 1994, **50**, 760-763.
7. P. D. Adams, P. V. Afonine, G. Bunkoczi, V. B. Chen, I. W. Davis, N. Echols, J. J. Headd, L. W. Hung, G. J. Kapral, R. W. Grosse-Kunstleve, A. J. McCoy, N. W. Moriarty, R. Oeffner, R. J. Read, D. C. Richardson, J. S. Richardson, T. C. Terwilliger and P. H. Zwart, *Acta Crystallogr D Biol Crystallogr*, 2010, **66**, 213-221.
8. P. Emsley and K. Cowtan, *Acta Crystallogr D Biol Crystallogr*, 2004, **60**, 2126-2132.
9. E. Krissinel and K. Henrick, *J Mol Biol*, 2007, **372**, 774-797.
10. R. F. Alford, A. Leaver-Fay, J. R. Jeliazkov, M. J. O'Meara, F. P. DiMaio, H. Park, M. V. Shapovalov, P. D. Renfrew, V. K. Mulligan, K. Kappel, J. W. Labonte, M. S. Pacella, R. Bonneau, P. Bradley, R. L. Dunbrack, R. Das, D. Baker, B. Kuhlman, T. Kortemme and J. J. Gray, *J. Chem. Theory Comput.*, 2017, **13**, 3031-3048.
11. M. D. Hanwell, D. E. Curtis, D. C. Lonie, T. Vandermeersch, E. Zurek and G. R. Hutchison, *J Cheminform*, 2012, **4**, 17.
12. W. J. Hehre, *Accounts of Chemical Research*, 1976, **9**, 399-406.
13. M. V. Shapovalov and R. L. Dunbrack, Jr., *Structure*, 2011, **19**, 844-858.
14. C. Andreini, G. Cavallaro, S. Lorenzini and A. Rosato, *Nucleic Acids Res.*, 2013, **41**, D312-319.
15. E. N. Salgado, J. Faraone-Mennella and F. A. Tezcan, *J. Am. Chem. Soc.*, 2007, **129**, 13374-13375.
16. E. N. Salgado, X. I. Ambroggio, J. D. Brodin, R. A. Lewis, B. Kuhlman and F. A. Tezcan, *Proc. Natl. Acad. Sci. USA*, 2010, **107**, 1827-1832.
